# Supplementary material for: Perceived Cognitive Deficits in Patients With Symptomatic SARS-CoV-2 and Their Association With Post–COVID-19 Condition
Source: PubMed Central journal article supplement (PMC10715897; doi:10.1001/jamanetworkopen.2023.11974), 2023-05-01
Supplement: NIHMS1947968-supplement-Supplemental_material_1.pdf [file NIHMS1947968-supplement-Supplemental_material_1.pdf]

## Supplemental Online Content

Liu TC, Yoo SM, Sim MS, Motwani Y, Viswanathan N, Wenger NS. Perceived cognitive deficits in patients with symptomatic SARS-CoV-2 and their association with post-COVID-19 condition. *JAMA Netw Open*. 2023;6(5):e2311974. doi:10.1001/jamanetworkopen.2023.11974

**eTable 1.** Clinical and Functional Survey

**eTable 2.** Symptoms During Acute COVID-19 and at 30-Day Interview

**eTable 3.** Complete Case Analysis: Factors Associated With Development of Long COVID

This supplemental material has been provided by the authors to give readers additional information about their work.

**eTable 1. Clinical and Functional Survey**

Information obtained by trained clinical staff (RNs) at 30 days, 60 days, and 90 days after acute illness or hospitalization.

|          |                                                                                                                                             |                                                                                                                                                                                                                                                                                                                                                                                                                                                                                |
|----------|---------------------------------------------------------------------------------------------------------------------------------------------|--------------------------------------------------------------------------------------------------------------------------------------------------------------------------------------------------------------------------------------------------------------------------------------------------------------------------------------------------------------------------------------------------------------------------------------------------------------------------------|
| <b>1</b> | Do you feel your health is back to normal? (If YES, skip next question 3)                                                                   | <input type="checkbox"/> Yes <input type="checkbox"/> No                                                                                                                                                                                                                                                                                                                                                                                                                       |
| <b>2</b> | Compare to 4 weeks ago, how would you rate your health now? (1=way worse than prior baseline; 10=back to normal)                            |                                                                                                                                                                                                                                                                                                                                                                                                                                                                                |
| <b>3</b> | During the past 4 weeks, has your physical health interfered with your normal social activities with family, friends, neighbors, or groups? | <input type="checkbox"/> Yes <input type="checkbox"/> No<br>Explain:                                                                                                                                                                                                                                                                                                                                                                                                           |
| <b>4</b> | During the past 4 weeks, have you had any problems with your work or other regular daily activities as a result of your physical health?    | <input type="checkbox"/> Yes <input type="checkbox"/> No<br>Explain:                                                                                                                                                                                                                                                                                                                                                                                                           |
| <b>5</b> | What is the maximal exertion you could do BEFORE COVID-19 diagnosis? (Choose the highest level of activity you were able to do)             | <input type="checkbox"/> Vigorous activities, such as running, lifting heavy objects, participating in strenuous sports<br><input type="checkbox"/> Moderate activities, such as moving a table, pushing a vacuum cleaner, bowling, or playing golf<br><input type="checkbox"/> Climbing one flight of stairs<br><input type="checkbox"/> Walking one block<br><input type="checkbox"/> Lifting or carrying groceries<br><input type="checkbox"/> Bathing or dressing yourself |
| <b>6</b> | Does your health now limit you in these activities? If so, how much?                                                                        |                                                                                                                                                                                                                                                                                                                                                                                                                                                                                |
|          | Vigorous activities, such as running, lifting heavy objects, participating in strenuous sports                                              | <input type="checkbox"/> Yes, limited a lot<br><input type="checkbox"/> Yes, limited a little<br><input type="checkbox"/> No, not limited at all                                                                                                                                                                                                                                                                                                                               |
|          | Moderate activities, such as moving a table, pushing a vacuum cleaner, bowling, or playing golf                                             | <input type="checkbox"/> Yes, limited a lot<br><input type="checkbox"/> Yes, limited a little<br><input type="checkbox"/> No, not limited at all                                                                                                                                                                                                                                                                                                                               |
|          | Climbing one flight of stairs                                                                                                               | <input type="checkbox"/> Yes, limited a lot<br><input type="checkbox"/> Yes, limited a little<br><input type="checkbox"/> No, not limited at all                                                                                                                                                                                                                                                                                                                               |
|          | Walking one block                                                                                                                           | <input type="checkbox"/> Yes, limited a lot<br><input type="checkbox"/> Yes, limited a little<br><input type="checkbox"/> No, not limited at all                                                                                                                                                                                                                                                                                                                               |
|          | Lifting or carrying groceries                                                                                                               | <input type="checkbox"/> Yes, limited a lot<br><input type="checkbox"/> Yes, limited a little<br><input type="checkbox"/> No, not limited at all                                                                                                                                                                                                                                                                                                                               |
|          | Bathing or dressing yourself                                                                                                                | <input type="checkbox"/> Yes, limited a lot<br><input type="checkbox"/> Yes, limited a little                                                                                                                                                                                                                                                                                                                                                                                  |

|          |                                                                                                                  |                                                                                                                                                                                                                                                                                                                                                                                                                                                                                                                                                                                                                                                                                                                                                                          |
|----------|------------------------------------------------------------------------------------------------------------------|--------------------------------------------------------------------------------------------------------------------------------------------------------------------------------------------------------------------------------------------------------------------------------------------------------------------------------------------------------------------------------------------------------------------------------------------------------------------------------------------------------------------------------------------------------------------------------------------------------------------------------------------------------------------------------------------------------------------------------------------------------------------------|
|          |                                                                                                                  | <input type="checkbox"/> No, not limited at all                                                                                                                                                                                                                                                                                                                                                                                                                                                                                                                                                                                                                                                                                                                          |
| <b>7</b> | After the COVID-19 diagnosis, how often did you                                                                  |                                                                                                                                                                                                                                                                                                                                                                                                                                                                                                                                                                                                                                                                                                                                                                          |
|          | Have trouble getting things organized during the last 4 weeks?                                                   | <input type="checkbox"/> Never<br><input type="checkbox"/> Rarely<br><input type="checkbox"/> Sometimes<br><input type="checkbox"/> Often<br><input type="checkbox"/> Almost always                                                                                                                                                                                                                                                                                                                                                                                                                                                                                                                                                                                      |
|          | Have trouble concentrating on things like watching television program or reading a book during the last 4 weeks? | <input type="checkbox"/> Never<br><input type="checkbox"/> Rarely<br><input type="checkbox"/> Sometimes<br><input type="checkbox"/> Often<br><input type="checkbox"/> Almost always                                                                                                                                                                                                                                                                                                                                                                                                                                                                                                                                                                                      |
|          | Forget what you talked about after a telephone conversation?                                                     | <input type="checkbox"/> Never<br><input type="checkbox"/> Rarely<br><input type="checkbox"/> Sometimes<br><input type="checkbox"/> Often<br><input type="checkbox"/> Almost always                                                                                                                                                                                                                                                                                                                                                                                                                                                                                                                                                                                      |
| <b>8</b> | Have you had any of the following symptoms over last 4 weeks? Have the symptoms resolved?                        | <input type="checkbox"/> Fever, chills or night sweats -- <input type="checkbox"/> Resolved<br><input type="checkbox"/> Loss of smell or taste -- <input type="checkbox"/> Resolved<br><input type="checkbox"/> Fatigue -- <input type="checkbox"/> Resolved<br><input type="checkbox"/> Shortness of breath -- <input type="checkbox"/> Resolved<br><input type="checkbox"/> Chest pain -- <input type="checkbox"/> Resolved<br><input type="checkbox"/> Numbness or tingling -- <input type="checkbox"/> Resolved<br><input type="checkbox"/> Nausea, vomiting, or diarrhea -- <input type="checkbox"/> Resolved<br><input type="checkbox"/> Muscle aches -- <input type="checkbox"/> Resolved<br><input type="checkbox"/> Rashes -- <input type="checkbox"/> Resolved |

**eTable 2. Symptoms During Acute COVID-19 and at 30-Day Interview**

|                                      | <b>Present during acute COVID</b> | <b>Present at 30-days after COVID</b> |
|--------------------------------------|-----------------------------------|---------------------------------------|
| <b>Fever, chills or night sweats</b> | <b>43%</b>                        | <b>0.8%</b>                           |
| <b>Loss of smell or taste</b>        | <b>32%</b>                        | <b>6%</b>                             |
| <b>Fatigue</b>                       | <b>62%</b>                        | <b>20%</b>                            |
| <b>Shortness of breath</b>           | <b>56%</b>                        | <b>11%</b>                            |
| <b>Chest pain</b>                    | <b>20%</b>                        | <b>3%</b>                             |
| <b>Numbness or tingling</b>          | <b>12%</b>                        | <b>3%</b>                             |
| <b>Nausea, vomiting or diarrhea</b>  | <b>30%</b>                        | <b>2%</b>                             |
| <b>Muscle aches</b>                  | <b>45%</b>                        | <b>5%</b>                             |
| <b>Rash</b>                          | <b>9%</b>                         | <b>0.5%</b>                           |

**eTable 3. Complete Case Analysis: Factors Associated With Development of Long COVID**

|                                     | <b>Odds Ratio<br/>(95% Confidence interval)</b> |
|-------------------------------------|-------------------------------------------------|
| Age                                 |                                                 |
| 18-39                               | Ref                                             |
| 40-59                               | 0.95 (0.51 - 1.78)                              |
| 60+                                 | 0.97 (0.50 - 1.88)                              |
| Sex                                 |                                                 |
| Female                              | 1.03 (0.70 - 1.50)                              |
| Male                                | Ref                                             |
| Race                                |                                                 |
| Black                               | 0.93 (0.45 - 1.93)                              |
| Asian                               | 0.87 (0.43 - 1.74)                              |
| Latino                              | 1.06 (0.64 - 1.75)                              |
| Other/Unknown                       | 0.70 (0.35 - 1.38)                              |
| White                               | Ref                                             |
| Comorbidities                       |                                                 |
| Diabetes                            | 1.74 (1.19 - 2.55)                              |
| Organ transplant                    | 0.48 (0.25 - 0.91)                              |
| Body mass index                     | 1.00 (0.98 - 1.03)                              |
| Insurance                           |                                                 |
| Commercial                          | Ref                                             |
| Medicare                            | 0.83 (0.53 - 1.31)                              |
| Medicaid                            | 0.54 (0.30 - 0.98)                              |
| Other                               | 0.83 (0.53 - 1.31)                              |
| Social Vulnerability Index          |                                                 |
| 0-25 percentile                     | Ref                                             |
| 25-50 <sup>th</sup> percentile      | 0.81 (0.48 - 1.36)                              |
| 50-75 <sup>th</sup> percentile      | 0.86 (0.49 - 1.51)                              |
| >75 <sup>th</sup> percentile        | 1.07 (0.59 - 1.93)                              |
| Missing                             | 1.17 (0.47 - 2.88)                              |
| Elixhauser comorbidity score        | 1.00 (0.98 - 1.01)                              |
| Venue of care                       |                                                 |
| Inpatient                           | 1.56 (0.99 - 2.46)                              |
| Outpatient                          | Ref                                             |
| Baseline functional status          |                                                 |
| Vigorous                            | Ref                                             |
| Moderate                            | 0.86 (0.53 - 1.40)                              |
| 1 flight stairs or walk 1 block     | 0.64 (0.36 - 1.16)                              |
| Carry groceries/bathe/dress         | 0.97 (0.39 - 2.42)                              |
| Missing                             | 0.47 (0.12 - 1.87)                              |
| History of neurocognitive condition |                                                 |
| Cognitive decline                   | 1.48 (0.87 - 2.51)                              |
| Depressive disorder                 | 1.14 (0.70 - 1.85)                              |
| Anxiety disorder                    | 1.04 (0.67 - 1.61)                              |
| Perceived Cognitive Deficits score  |                                                 |
| 0                                   | Ref                                             |
| >0 to 1.5                           | 2.51 (1.63 - 3.85)                              |
| >1.5 to 4                           | 2.79 (1.69 - 4.59)                              |

Ordinal logistic regression, n=679 complete cases

Reference for Diabetes is No diabetes, for Organ transplant is No organ transplant. Unit for Body mass index and Elixhauser comorbidity index is 1 unit.
