# Supplementary material for: Perceived Cognitive Deficits in Patients With Symptomatic SARS-CoV-2 and Their Association With Post–COVID-19 Condition
Source: PubMed Central journal article supplement (PMC10715897; doi:10.1001/jamanetworkopen.2023.11974), 2023-05-01
Supplement: NIHMS1947968-supplement-Supplemental_material_2.pdf [file NIHMS1947968-supplement-Supplemental_material_2.pdf]

## Data Sharing Statement

Liu. Perceived Cognitive Deficits in Patients With Symptomatic SARS-CoV-2 and Their Association With Post-COVID-19 Condition. *JAMA Netw Open*. Published May 05, 2023. doi:10.1001/jamanetworkopen.2023.11974

### Data

**Data available:** No

### Additional Information

**Explanation for why data not available:** Analysis is ongoing
